# Supplementary material for: Phytogenic silver nanoparticles synthesized from Dendrophthoe falcata and Ocimum tenuiflorum: SERS and ultrafast nonlinear optical studies
Source: Royal Society of Chemistry journal article supplement (doi:10.1039/d6ra00003g), 2026-03-31
Supplement: d6ra00003g1.pdf [file d6ra00003g1.pdf]

**Supplementary Data**

**Phytogenic Silver Nanoparticles Synthesized from  
*Dendrophthoe Falcata* and *Ocimum Tenuiflorum*: SERS  
and Ultrafast Nonlinear Optical Studies**

**Jhansi Mogilipuri,<sup>1</sup> Srilakshmi P. Bhaskar,<sup>2</sup> Venugopal Rao Soma,<sup>3,\*</sup> Sabitha Mohan<sup>1,\*</sup>**

<sup>1</sup>Department of Physical and Chemical Sciences, Sri Sathya Sai University for Human Excellence,  
Navanihal, Kalaburagi, Karnataka 585313

<sup>2</sup>Department of Chemistry, Vimala College (Autonomous), Thrissur, Kerala 680009

<sup>3</sup>School of Physics and DIA-CoE (formerly ACRHEM), University of Hyderabad,  
Hyderabad 500046, India

**Corresponding Authors email: [soma\\_venu@yahoo.com](mailto:soma_venu@yahoo.com), [sabitha.m@sssuhe.ac.in](mailto:sabitha.m@sssuhe.ac.in)**

(1) TEM Micrographs

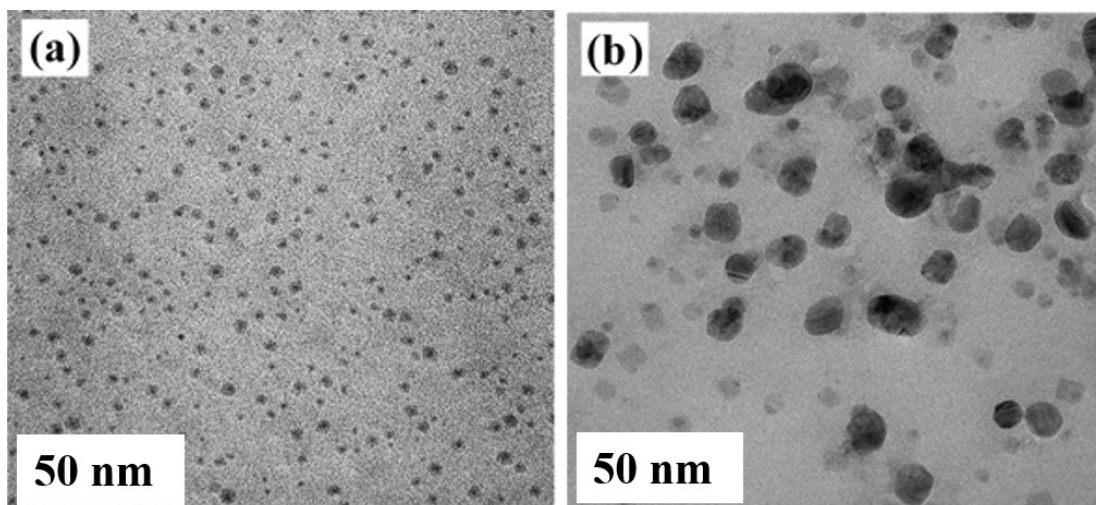

**Figure S1** (a) & (b) present the TEM micrographs of AgL and AgT samples, respectively, at a resolution of 50 nm.

(2) **Table 1** presenting the analytic field enhancement factors of AgL and AgT substrates

| Sample | Intensity         | PA<br>[823 cm <sup>-1</sup> ] | NB<br>[592 cm <sup>-1</sup> ] | MB<br>[477 cm <sup>-1</sup> ] | CV<br>[1618 cm <sup>-1</sup> ] |
|--------|-------------------|-------------------------------|-------------------------------|-------------------------------|--------------------------------|
| AgL    | I <sub>SERS</sub> | 222 (10 μM)                   | 366 (10 nM)                   | 417 (100 nM)                  | 521 (50 μM)                    |
|        | I <sub>R</sub>    | 128 (50 mM)                   | 30 (1 mM)                     | 152 (1 mM)                    | 20 (1 mM)                      |
|        | AEF               | 0.86×10 <sup>4</sup>          | 1.2×10 <sup>6</sup>           | 2.7×10 <sup>4</sup>           | 0.52×10 <sup>3</sup>           |
| AgT    | I <sub>SERS</sub> | 128 (10 μM)                   | 311 (1 μM)                    | 485 (1 μM)                    | 177 (50 μM)                    |
|        | I <sub>R</sub>    | 128 (50 mM)                   | 30 (1 mM)                     | 152 (1 mM)                    | 20 (1 mM)                      |
|        | AEF               | 0.5×10 <sup>4</sup>           | 0.1×10 <sup>5</sup>           | 3.19×10 <sup>3</sup>          | 0.17×10 <sup>3</sup>           |

## Z-SCAN of Water

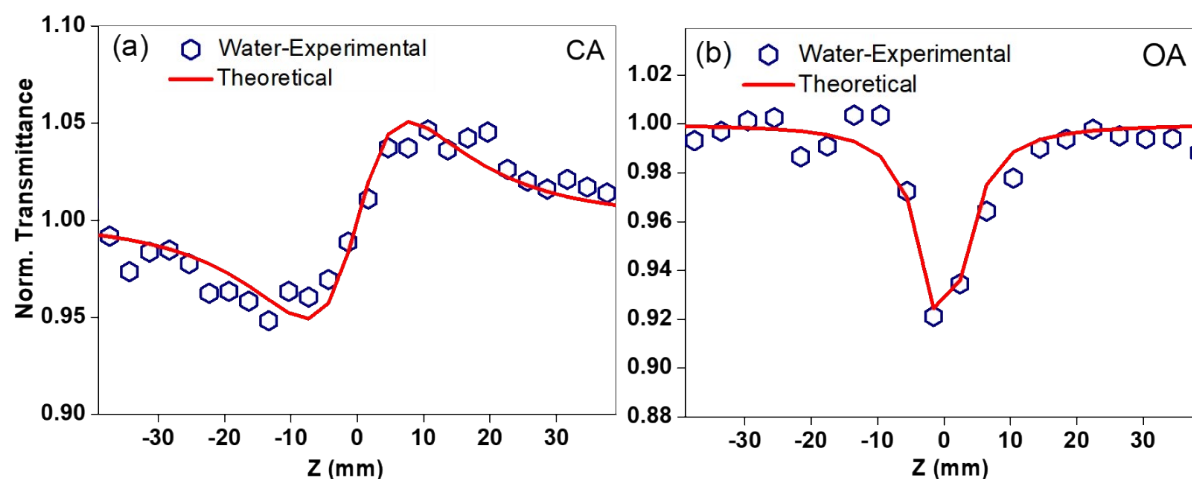

**Figure S2** (a) and (b) presents the CA and OA Z-scan data of water (solvent used in the experiments), respectively.

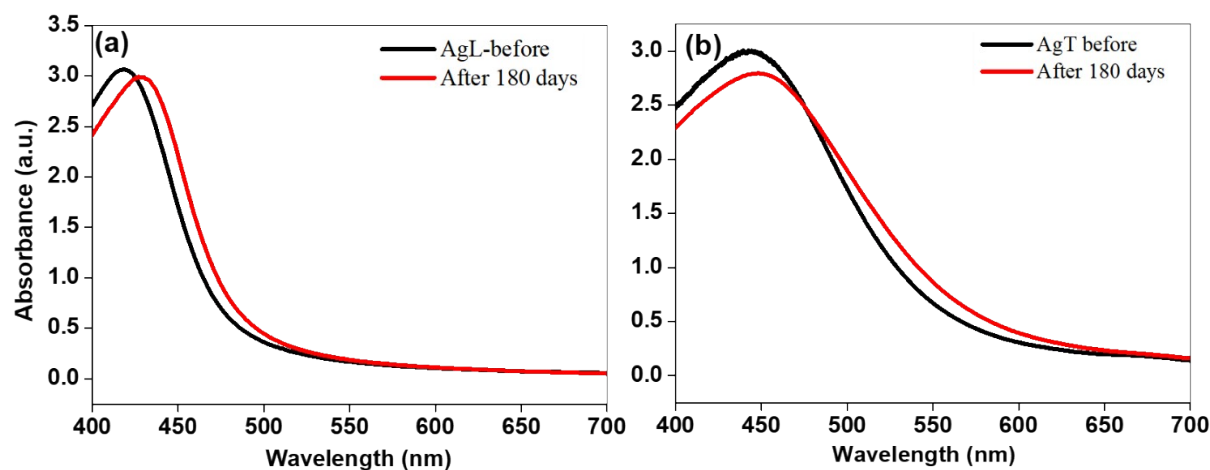

**Figure S3** (a) and (b) Absorbance spectra of AgL and AgT, respectively, before (black) and after 180 days (red).

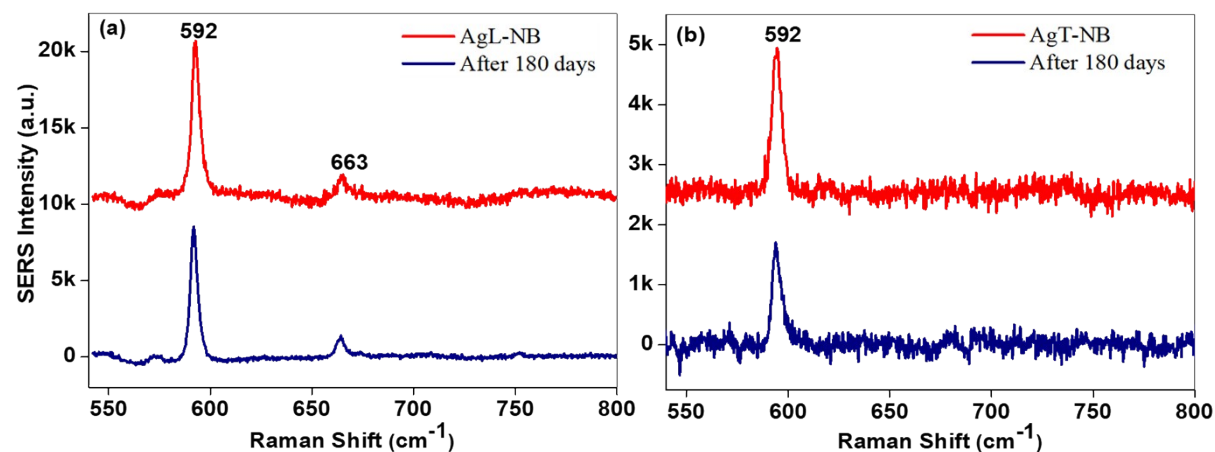

**Figure S4** (a) and (b) The SERS spectra of Nile blue at a concentration of 10  $\mu\text{M}$  before (red) and after (navy blue) 180 days using AgL and AgT substrates, respectively

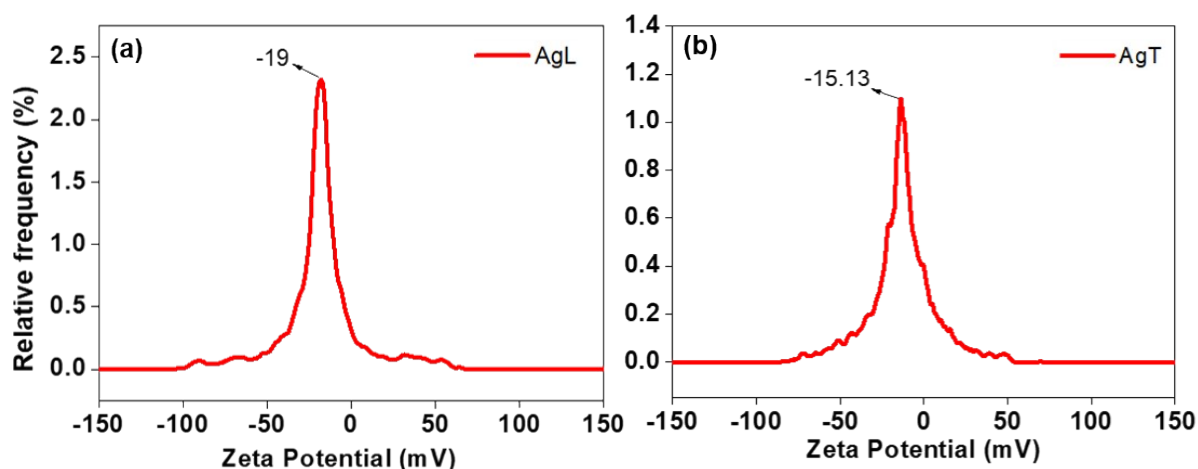

**Figure S5** (a) and (b) represents the Zeta Potential measurements for AgL and AgT indicating the surface charge and colloidal stability of the respective nanoparticle systems.

**Table 2: Raman modes and their assignments of NB<sup>1,2</sup>**

| S. No | Raman Shift( $\text{cm}^{-1}$ ) |          |     | Peak Assignments                 |
|-------|---------------------------------|----------|-----|----------------------------------|
|       | Reported                        | Observed |     |                                  |
|       |                                 | AgL      | AgT |                                  |
| 1     | 595                             | 592      | 663 | C-C-C and C-N-C deformations     |
| 2     | 673                             | 592      | 663 | In-plane CCC or NCC deformations |

**Table 3: Raman modes and their assignments of PA<sup>3,4</sup>**

| S. No | Raman Shift( $\text{cm}^{-1}$ ) |          |      | Peak Assignments                                                |
|-------|---------------------------------|----------|------|-----------------------------------------------------------------|
|       | Reported                        | Observed |      |                                                                 |
|       |                                 | AgL      | AgT  |                                                                 |
| 1     | 825                             | 823      | 823  | CN stretching; $\text{NO}_2$ scissoring in-plane deformation    |
| 2     | 935                             | 939      | 939  | CN stretching; ring CCC in-plane bending<br>In-plane CH bending |
| 3     | 1338                            | 1344     | 1344 | $\text{NO}_2$ symmetric stretching                              |

**Table 4: Raman modes and their assignments of MB<sup>5,6</sup>**

| S. No | Raman Shift( $\text{cm}^{-1}$ ) |            |            | Peak Assignments              |
|-------|---------------------------------|------------|------------|-------------------------------|
|       | Reported                        | Observed   |            |                               |
|       |                                 | AgL        | AgT        |                               |
| 1     | 448                             | 445<br>477 | 447<br>477 | Skeletal deformation of C-N-C |
| 2     | 501                             | 939        |            | Skeletal deformation of C-N-C |
| 3     | 596                             | 596        | 596        | Skeletal deformation of C-S-C |

|    |      |      |      |                                  |
|----|------|------|------|----------------------------------|
| 4  | 671  | 675  | 675  | Out of plane bending of C-H      |
| 5  | 770  | 775  | 773  | In-plane bending of C-H          |
| 6  | 890  |      | 897  | In-plane bending of C-H          |
| 7  | 951  | 950  | 958  | In-plane bending of C-H          |
| 8  | 1040 | 1030 | 1030 | In-plane bending of C-H          |
| 9  | 1154 | 1154 | 1153 | In-plane bending of C-H          |
| 10 | 1302 | 1304 | 1305 | In-plane ring deformation of C-H |
| 11 | 1394 | 1394 | 1394 | Symmetric stretching of C-N      |
| 12 | 1502 | 1505 | 1507 | Asymmetric stretching of C-C     |
| 13 | 1623 | 1624 | 1624 | Ring stretching of C-C           |

**Table 5: Raman peaks and their assignments of CV<sup>7,8,9</sup>**

| S. No | Raman Shift(cm <sup>-1</sup> ) |            |            | Peak Assignments                |
|-------|--------------------------------|------------|------------|---------------------------------|
|       | Reported                       | Observed   |            |                                 |
|       |                                | AgL        | AgT        |                                 |
| 1     | 425                            | 418<br>441 | 423<br>441 | Bending deformation of CNC      |
| 2     | 560                            |            | 563        | Out-of-plane deformation of CNC |
| 3     | 715                            | 728<br>759 | 726<br>757 | Stretching CN                   |
| 4     | 902                            | 915        | 915        | Bending of CCC                  |
| 5     | 1165                           | 1174       | 1174       | Symmetric stretching CCC        |
| 6     | 1380                           | 1371       | 1372       | Bending CH                      |
| 7     | 1462                           | 1470       |            | Asymmetric Bending CH3          |
| 8     | 1532                           | 1531       | 1530       | Stretching CN                   |
|       |                                | 1591       | 1585       | Symmetric stretching CC         |
| 9     | 1619                           | 1618       | 1617       | Symmetric stretching CC         |

## References

- (1) Bodelon, G.; Montes García, V.; Fernández-López, C.; Pastoriza-Santos, I.; Pérez-Juste, J.; Liz-Marzán, L. Bioimaging: Au@pNIPAM SERRS Tags for Multiplex Immunophenotyping Cellular Receptors and Imaging Tumor Cells (Small 33/2015). *Small* **2015**, *11*. <https://doi.org/10.1002/sml.201500269>.
- (2) Moram, S. S. B.; Byram, C.; Soma, V. R. Gold-Nanoparticle- and Nanostar-Loaded Paper-Based SERS Substrates for Sensing Nanogram-Level Picric Acid with a Portable Raman Spectrometer. *Bull Mater Sci* **2020**, *43* (1), 53. <https://doi.org/10.1007/s12034-019-2017-8>.
- (3) Hakonen, A.; Wu, K.; Stenbæk Schmidt, M.; Andersson, P. O.; Boisen, A.; Rindzevicius, T. Detecting Forensic Substances Using Commercially Available SERS Substrates and Handheld Raman Spectrometers. *Talanta* **2018**, *189*, 649–652. <https://doi.org/10.1016/j.talanta.2018.07.009>.
- (4) Byram, C.; Moram, S. S. B.; Shaik, A. K.; Soma, V. R. Versatile Gold Based SERS Substrates Fabricated by Ultrafast Laser Ablation for Sensing Picric Acid and Ammonium Nitrate. *Chemical Physics Letters* **2017**, *685*, 103–107.
- (5) Li, C.; Huang, Y.; Lai, K.; Rasco, B. A.; Fan, Y. Analysis of Trace Methylene Blue in Fish Muscles Using Ultra-Sensitive Surface-Enhanced Raman Spectroscopy. *Food Control* **2016**, *65*, 99–105.

- (6) Pham, T. T. H.; Vu, X. H.; Dien, N. D.; Trang, T. T.; Chi, T. T. K.; Phuong, P. H.; Nghia, N. T. Ag Nanoparticles on ZnO Nanoplates as a Hybrid SERS-Active Substrate for Trace Detection of Methylene Blue. *RSC advances* **2022**, *12* (13), 7850–7863.
- (7) Cañamares, M. V.; Chenal, C.; Birke, R. L.; Lombardi, J. R. DFT, SERS, and Single-Molecule SERS of Crystal Violet. *J. Phys. Chem. C* **2008**, *112* (51), 20295–20300. <https://doi.org/10.1021/jp807807j>.
- (8) Rekha, C. R.; Sameera, S.; Nayar, V. U.; Gopchandran, K. G. Simultaneous Detection of Different Probe Molecules Using Silver Nanowires as SERS Substrates. *Spectrochimica Acta Part A: Molecular and Biomolecular Spectroscopy* **2019**, *213*, 150–158.
- (9) Mandavkar, R.; Lin, S.; Pandit, S.; Kulkarni, R.; Burse, S.; Habib, M. A.; Kunwar, S.; Lee, J. Hybrid SERS Platform by Adapting Both Chemical Mechanism and Electromagnetic Mechanism Enhancements: SERS of 4-ATP and CV by the Mixture with QDs on Hybrid PdAg NPs. *Surfaces and Interfaces* **2022**, *33*, 102175.
